## Acute Postoperative Pain Trajectory Groups: Comment

To the Editor:

In a laudable effort, Vasilopoulos *et al.*<sup>1</sup> studied the early postoperative pain trajectories from a mixed surgical population with the aim to improve prediction of pain responses, thereby serving as a basis for a future personalized analgesic approach to optimize recovery. The study included a detailed preoperative assessment of relevant patient characteristics and intraoperative use of anesthetic and analgesic interventions subsequently analyzed with relevant multiple statistical methods.

As presented, this is one of the few studies to cover this important topic, but it is surprising that despite the detailed *pre-* and *intraoperative* data, there is no detailed information about *postoperative* pain treatment for the primary 0 to 7 days *postoperative* pain outcome. Neither does it seem to be included in the analysis of the *postoperative* pain trajectory.

Consequently, because of the lack of detailed information on *postoperative* pain treatment (which unfortunately was only presented in general terms in Appendix 1), it may be difficult to interpret this otherwise important study. Thus, a better and more helpful design would be the same methodology but assessed in fewer procedure-specific populations and then with exact information on *postoperative* pain management for the period in question, to allow sufficient analysis of interactions between *pre-*, *intra-* and *postoperative* characteristics and the effects of different *postoperative* pain interventions. As usual, important studies always raise questions on improvement strategies for future studies.

### Competing Interests

The authors declare no competing interests.

Henrik Kehlet, M.D., Ph.D., Nicolai Bang Foss, M.D., Ph.D.  
Rigshospitalet, Copenhagen, Denmark (H.K.).  
henrik.kehlet@regionh.dk

DOI: 10.1097/ALN.0000000000003875

(Accepted for publication June 2, 2021. Published online first on July 16, 2021.)

## Acute Postoperative Pain Trajectory Groups: Reply

In Reply:

WE sincerely thank Drs. Kehlet and Foss<sup>1</sup> for their commentary on our study<sup>2</sup> of the determinants of *postoperative* pain trajectories. The authors correctly highlight that, although we were able to provide a detailed analysis of *pre-* and *intraoperative* characteristics, our study did not robustly characterize *postoperative* pain management and its relation to *postoperative* pain trajectories. In the analysis we were able to perform and present, we provided support for a relationship between *postoperative* opioid requirement and *postoperative* pain trajectory (Kruskal-Wallis  $H = 54.8$ ,  $df = 4$ ,  $P < 0.001$ ), with patients in the higher pain trajectories requiring greater *postoperative* opioids (fig. 1, with numbers from Table 3 in the original article<sup>2</sup>). However, as the authors note, with our heterogeneous patient sample, there was similar heterogeneity in *postoperative* pain management, limiting our analysis. We agree with the authors that studies with more homogeneous patient populations regarding procedure type would be better able to characterize *perioperative* pain management and how it is related to *postoperative* pain trajectories. We are excited that we were able to contribute to this important clinical topic.

### Research Support

The work for the published article was supported by the National Institutes of Health (Bethesda, Maryland; grant No. R01 GM114290 to Dr. Tighe) and the Donn M. Dennis, M.D., Professorship in Anesthetic Innovation, University of Florida (Gainesville, Florida; to Dr. Tighe).

### Competing Interests

The authors declare no competing interests.

Terrie Vasilopoulos, Ph.D., Patrick J. Tighe, M.D., M.S.  
University of Florida College of Medicine, Gainesville, Florida  
(T.V.). tvasilopoulos@anest.ufl.edu

DOI: 10.1097/ALN.0000000000003874

### References

1. Kehlet H, Foss NB: Acute postoperative pain trajectory groups: Comment. *ANESTHESIOLOGY* 2021; 135: 547

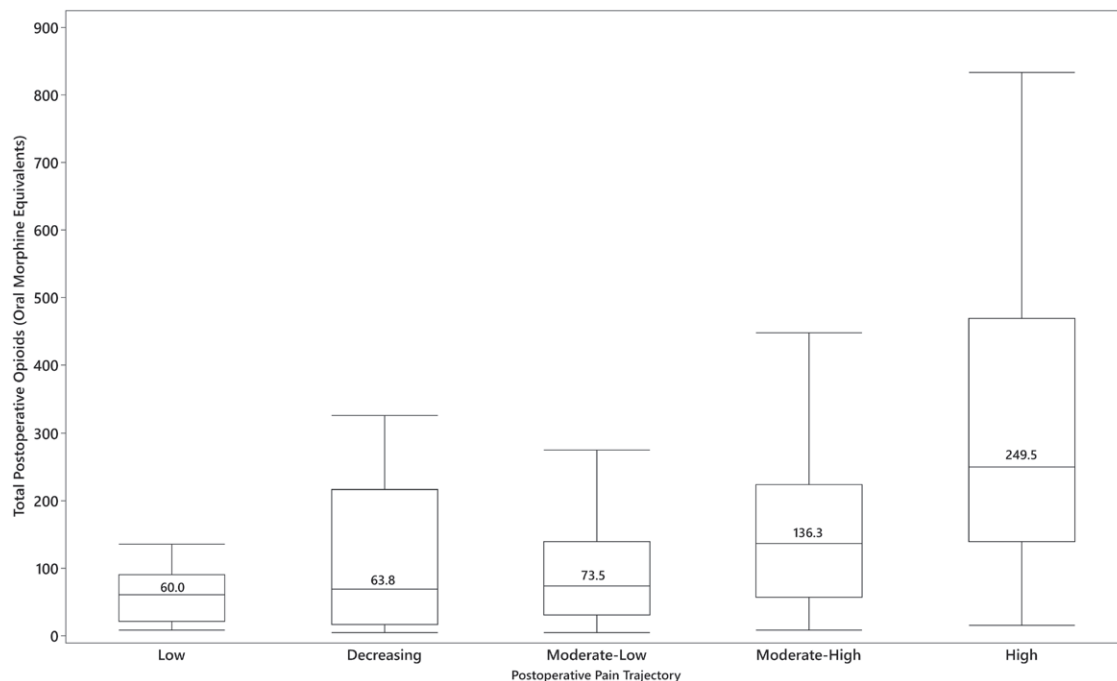

**Fig. 1.** Box plot of total postoperative opioids stratified by postoperative pain trajectory group. *Labels* indicate median values.

- Vasilopoulos T, Wardhan R, Rashidi P, Fillingim RB, Wallace MR, Crispin PL, Parvataneni HK, Prieto HA, Machuca TN, Hughes SJ, Murad GJA, Tighe PJ; Temporal Postoperative Pain Signatures (TEMPOS) Group: Patient and procedural determinants of postoperative pain trajectories. *ANESTHESIOLOGY* 2021; 134:421–34

(Accepted for publication June 2, 2021. Published online first on July 16, 2021.)

## A Crack in the Wall, or How Artificial Intelligence Would Classify Pink Floyd?

To the Editor:

We were interested to see that our recent editorial entitled “A Crack at MAC,”<sup>1</sup> was classified as relating to crack cocaine. In particular, the editorial was indexed on the *ANESTHESIOLOGY* website (<https://pubs.asahq.org/>

*anesthesiology*/article/134/6/835/115687/A-Crack-at-MAC) with the topics “crack cocaine” and “minimum alveolar concentration” (fig. 1). We feel obliged to make a disclaimer: Potential readers with an interest in addiction medicine will be disappointed. We presume that the classification links are generated by some sort of artificial intelligence classification process. This misclassification demonstrates the profound limitations of the semantic depth of artificial intelligence processes. These processes can link patterns nicely, but, underneath all the frothy hubris, artificial intelligence is a zombie that would see nothing wrong with classifying the iconic Pink Floyd song (“Another Brick in the Wall”) as a masonry manual. By chance, a survey on Artificial Intelligence in Anesthesiology has just been initiated (“2021 Survey on Artificial Intelligence in Anesthesiology,” Carlos Estrada Alamo, M.D., M.B.A., Penn Medicine, University of Pennsylvania Health System, Philadelphia, Pennsylvania). Could you trust a machine that can’t even understand that the word “crack” has at least 11 different meanings, and might even be a verb?

### Competing Interests

The authors declare no competing interests.

Misha Perouansky, M.D., Jamie W. Sleight, M.D. University of Wisconsin–Madison, Madison, Wisconsin (M.P.).  
mperouansky@wisc.edu

DOI: 10.1097/ALN.0000000000003865
